# Supplementary material for: Quantitative Analysis of Methylated Adenosine Modifications Revealed Increased Levels of N6-Methyladenosine (m6A) and N6,2′-O-Dimethyladenosine (m6Am) in Serum From Colorectal Cancer and Gastric Cancer Patients
Source: Front Cell Dev Biol. 2021 Jul 26;9:694673. doi: 10.3389/fcell.2021.694673 (PMC8350345; doi:10.3389/fcell.2021.694673)
Supplement: Supplementary file 1 [file Data_Sheet_1.docx]

**Quantitative analysis of methylated adenosine modifications revealed increased levels of *N*6-methyladenosine (m6A) and *N*6,2′-O-dimethyladenosine (m6Am) in serum from colorectal cancer and gastric cancer patients**

Yiqiu Hu1, Zhihao Fang1, Jiayi Mu1, Yanqin Huang1, Shu Zheng1, Ying Yuan2*, Cheng Guo1*

1Cancer Institute (Key Laboratory of Cancer Prevention and Intervention, China National Ministry of Education), The Second Affiliated Hospital, Zhejiang University School of Medicine, Hangzhou, Zhejiang 310009, China

2Department of Medical Oncology, The Second Affiliated Hospital, Zhejiang University School of Medicine, Hangzhou, Zhejiang 310009, China

*Corresponding author:

Ying Yuan, yuanying1999@zju.edu.cn;

Cheng Guo, cheng_guo@zju.edu.cn

Tel.: +86-571-87784501; Fax: +86-571-87214404.

**Supplementary Information**

**Table S1.** The optimized MRM parameters for methylated adenosine modifications and isotope-labelled internal standards.

**Table S2.** Levels of A, m6A, m1A and m6Am in serum from healthy controls, colorectal cancer patients and gastric cancer patients.

**Table S3.** Recovery of the HILIC-MS/MS method obtained at three different spiking levels.

**Table S4.** Precision (intra- and interday) and accuracy of the developed HILIC-MS/MS method for the analysis of A, m6A, m1A and m6Am.

**Table S1.** The optimized MRM parameters for methylated adenosine modifications and isotope-labelled internal standards.

| **Compound** | **DP (V)** | **EP (V)** | **CE (V)** | **CXP (V)** |
| --- | --- | --- | --- | --- |
| A | 50 | 10 | 23 | 10 |
| [13C5]A | 50 | 10 | 21 | 10 |
| m6A | 55 | 10 | 25 | 10 |
| [D3]m6A | 50 | 10 | 27 | 10 |
| m1A | 45 | 8 | 23 | 10 |
| [D3]m1A | 50 | 10 | 27 | 10 |
| Am | 60 | 10 | 24 | 6 |
| m6Am | 50 | 10 | 25 | 10 |
| [D3]m6Am | 50 | 10 | 25 | 10 |
| m62A | 55 | 10 | 28 | 8 |

*DP* declustering potential, *CE* collision energy, *EP* entrance potential, *CXP* collision cell exit potential

**Table S2.** Levels of A, m6A, m1A and m6Am in serum from healthy controls, colorectal cancer patients and gastric cancer patients.

| **NO.** | **A**  **(nmol/l )** | **m6A**  **(nmol/l)** | **m1A**  **(nmol/l)** | **m6Am**  **(nmol/l)** |
| --- | --- | --- | --- | --- |
| N1 | 6.99 ± 0.57 | 3.43 ± 0.05 | 172.28 ± 0.09 | 1.25 ± 0.09 |
| N2 | 5.59 ± 0.03 | 5.13 ± 0.15 | 153.41 ± 1.69 | 0.71 ± 0.02 |
| N3 | 5.37 ± 0.05 | 4.98 ± 0.06 | 142.41 ± 2.81 | 1.45 ± 0.01 |
| N4 | 4.87 ± 0.06 | 4.65 ± 0.05 | 141.34 ± 2.49 | 0.99 ± 0.08 |
| N5 | 4.41 ± 0.14 | 3.92 ± 0.07 | 132.50 ± 1.89 | 0.82 ± 0.00 |
| N6 | 4.02 ± 0.19 | 4.46 ± 0.07 | 178.36 ± 1.50 | 0.31 ± 0.00 |
| N7 | 5.74 ± 0.06 | 5.23 ± 0.04 | 174.87 ± 4.28 | 0.47 ± 0.03 |
| N8 | 8.67 ± 0.06 | 4.42 ± 0.16 | 167.89 ± 1.39 | 0.60 ± 0.01 |
| N9 | 9.86 ± 0.20 | 3.55 ± 0.01 | 150.41 ± 7.52 | 0.17 ± 0.00 |
| N10 | 9.65 ± 0.10 | 4.44 ± 0.04 | 141.37 ± 4.76 | 0.27 ± 0.00 |
| N11 | 13.49 ± 0.09 | 5.77 ± 0.07 | 195.39 ± 3.34 | 0.20 ± 0.01 |
| N12 | 7.63 ± 0.24 | 3.93 ± 0.02 | 139.26 ± 1.08 | 0.20 ± 0.00 |
| N13 | 9.36 ± 0.18 | 4.78 ± 0.06 | 156.56 ± 2.01 | 0.69 ± 0.03 |
| N14 | 7.37 ± 0.21 | 5.67 ± 0.17 | 167.73 ± 9.14 | 0.44 ± 0.01 |
| N15 | 8.94 ± 0.37 | 4.24 ± 0.19 | 136.58 ± 5.90 | 0.26 ± 0.01 |
| N16 | 16.45 ± 0.04 | 5.83 ± 0.03 | 182.22 ± 0.11 | 0.49 ± 0.02 |
| N17 | 8.25 ± 0.05 | 5.72 ± 0.28 | 159.08 ± 2.99 | 0.25 ± 0.00 |
| N18 | 11.15 ± 0.33 | 5.67 ± 0.06 | 140.72 ± 1.89 | 0.20 ± 0.00 |
| N19 | 4.46 ± 0.03 | 4.13 ± 0.03 | 118.85 ± 4.40 | 0.26 ± 0.00 |
| N20 | 11.12 ± 0.30 | 5.00 ± 0.07 | 159.43 ± 1.55 | 0.75 ± 0.03 |
| N21 | 8.38 ± 0.02 | 4.12 ± 0.07 | 165.48 ± 2.07 | 0.24 ± 0.01 |
| N22 | 11.47 ± 0.13 | 4.05 ± 0.14 | 155.27 ± 6.05 | 0.26 ± 0.02 |
| N23 | 10.02 ± 0.17 | 5.18 ± 0.23 | 155.78 ± 1.51 | 0.30 ± 0.00 |
| N24 | 17.86 ± 0.25 | 4.51 ± 0.03 | 141.52 ± 3.19 | 0.77 ± 0.04 |
| N25 | 9.43 ± 0.22 | 3.81 ± 0.03 | 133.41 ± 20.57 | 0.37 ± 0.01 |
| N26 | 11.61 ± 0.12 | 4.98 ± 0.18 | 190.89 ± 4.11 | 0.23 ± 0.02 |
| N27 | 10.76 ± 0.12 | 5.23 ± 0.08 | 157.99 ± 6.37 | 0.48 ± 0.00 |
| N28 | 6.70 ± 0.21 | 4.86 ± 0.04 | 118.62 ± 17.39 | 1.06 ± 0.02 |
| N29 | 5.53 ± 0.10 | 4.64 ± 0.09 | 176.22 ± 7.77 | 0.81 ± 0.00 |
| N30 | 9.76 ± 0.08 | 6.85 ± 0.00 | 205.91 ± 7.42 | 0.33 ± 0.01 |
| N31 | 7.42 ± 0.31 | 4.52 ± 0.02 | 140.46 ± 5.01 | 0.27 ± 0.00 |
| N32 | 12.27 ± 0.19 | 6.67 ± 0.01 | 170.98 ± 4.92 | 1.00 ± 0.03 |
| N33 | 12.21 ± 0.19 | 4.85 ± 0.03 | 211.44 ± 5.83 | 0.76 ± 0.01 |
| N34 | 8.48 ± 0.013 | 4.52 ± 0.04 | 184.28 ± 10.13 | 1.20 ± 0.03 |
| N35 | 9.79 ± 0.07 | 4.54 ± 0.07 | 163.80 ± 6.10 | 0.69 ± 0.02 |
| N36 | 5.96 ± 0.01 | 3.76 ± 0.13 | 125.17 ± 13.02 | 0.96 ± 0.02 |
| N37 | 16.12 ± 0.21 | 3.23 ± 0.07 | 136.67 ± 14.40 | 0.61 ± 0.06 |
| N38 | 8.34 ± 0.12 | 3.00 ± 0.02 | 131.79 ± 10.25 | 1.10 ± 0.00 |
| N39 | 10.66 ± 0.06 | 3.70 ± 0.02 | 132.10 ± 8.34 | 1.08 ± 0.08 |
| N40 | 10.10 ± 0.32 | 4.46 ± 0.12 | 170.65 ± 10.47 | 0.99 ± 0.01 |
| N41 | 12.53 ± 0.56 | 4.40 ± 0.03 | 152.64 ± 7.13 | 0.87 ± 0.01 |
| N42 | 16.63 ± 0.15 | 3.43 ± 0.01 | 135.14 ± 5.69 | 1.44 ± 0.02 |
| N43 | 10.11 ± 0.14 | 4.68 ± 0.06 | 166.45 ± 17.95 | 0.35 ± 0.01 |
| N44 | 6.54 ± 0.15 | 3.94 ± 0.00 | 144.87 ± 26.02 | 0.73 ± 0.00 |
| N45 | 9.32 ± 0.11 | 4.05 ± 0.02 | 123.11 ± 8.46 | 0.84 ± 0.11 |
| N46 | 8.22 ± 0.08 | 2.69 ± 0.04 | 155.63 ± 9.31 | 1.19 ± 0.05 |
| N47 | 8.01 ± 0.00 | 4.49 ± 0.02 | 171.81 ± 10.97 | 0.53 ± 0.04 |
| N48 | 10.40 ± 0.43 | 3.38 ± 0.15 | 190.01 ± 8.10 | 0.66 ± 0.02 |
| N49 | 10.46 ± 0.35 | 4.48 ± 0.02 | 166.13 ± 6.91 | 0.64 ± 0.01 |
| N50 | 8.53 ± 0.05 | 2.82 ± 0.04 | 153.51 ± 8.47 | 0.73 ± 0.02 |
| N51 | 10.03 ± 0.10 | 2.95 ± 0.01 | 115.27 ± 6.18 | 0.37 ± 0.00 |
| N52 | 6.48 ± 0.27 | 4.53 ± 0.04 | 165.84 ± 9.64 | 0.78 ± 0.04 |
| N53 | 7.77 ± 0.09 | 3.70 ± 0.01 | 142.54 ± 5.52 | 0.65 ± 0.00 |
| N54 | 4.73 ± 0.21 | 2.24 ± 0.08 | 121.56 ± 15.83 | 0.89 ± 0.05 |
| N55 | 6.99 ± 0.33 | 4.04 ± 0.42 | 145.40 ± 7.21 | 1.04 ± 0.03 |
| N56 | 11.07 ± 0.10 | 3.72 ± 0.14 | 130.86 ± 5.64 | 0.29 ± 0.00 |
| N57 | 9.81 ± 0.15 | 3.74 ± 0.34 | 137.81 ± 8.63 | 0.35 ± 0.01 |
| N58 | 5.22 ± 0.07 | 3.48 ± 0.13 | 135.17 ± 8.35 | 0.50 ± 0.05 |
| N59 | 5.65 ± 0.25 | 3.26 ± 0.17 | 128.96 ± 9.41 | 0.78 ± 0.01 |
| N60 | 6.16 ± 0.04 | 3.50 ± 0.21 | 180.98 ± 18.87 | 1.06 ± 0.07 |
| N61 | 4.12 ± 0.11 | 2.60 ± 0.08 | 133.79 ± 2.57 | 0.30 ± 0.02 |
| N62 | 5.24 ± 0.01 | 3.57 ± 0.07 | 160.83 ± 11.86 | 0.16 ± 0.01 |
| N63 | 7.44 ± 0.02 | 2.61 ± 0.04 | 142.39 ± 5.57 | 0.30 ± 0.02 |
| N64 | 8.51 ± 0.25 | 6.89 ± 0.24 | 174.71 ± 3.14 | 0.60 ± 0.01 |
| N65 | 7.16 ± 0.02 | 2.91 ± 0.06 | 172.59 ± 2.80 | 0.26 ± 0.01 |
| N66 | 5.78 ± 0.00 | 6.44 ± 0.18 | 181.66 ± 0.55 | 0.50 ± 0.03 |
| N67 | 6.13 ± 0.09 | 4.46 ± 0.02 | 145.82 ± 15.50 | 0.36 ± 0.01 |
| N68 | 9.15 ± 0.22 | 5.54 ± 0.05 | 170.93 ± 11.14 | 0.57 ± 0.00 |
| N69 | 5.22 ± 0.17 | 4.77 ± 0.09 | 149.91 ± 8.84 | 0.73 ± 0.03 |
| N70 | 6.38 ± 0.03 | 5.94 ± 0.13 | 170.38 ± 4.03 | 0.28 ± 0.02 |
| N71 | 9.25 ± 0.49 | 4.32 ± 0.01 | 160.32 ± 19.42 | 0.21 ± 0.01 |
| N72 | 4.46 ± 0.08 | 5.19 ± 0.00 | 139.98 ± 7.67 | 0.40 ± 0.01 |
| N73 | 5.14 ± 0.15 | 3.44 ± 0.01 | 168.62 ± 14.86 | 0.36 ± 0.02 |
| N74 | 3.46 ± 0.14 | 3.79 ± 0.03 | 186.21 ± 1.68 | 1.55 ± 0.01 |
| N75 | 4.81 ± 0.20 | 3.59 ± 0.03 | 151.91 ± 7.40 | 0.61 ± 0.04 |
| N76 | 7.18 ± 0.45 | 5.71 ± 0.01 | 168.67 ± 16.86 | 0.43 ± 0.01 |
| N77 | 4.85 ± 0.20 | 4.97 ± 0.01 | 159.07 ± 9.61 | 0.44 ± 0.01 |
| N78 | 5.09 ± 0.07 | 2.71 ± 0.09 | 156.99 ± 10.47 | 0.58 ± 0.02 |
| N79 | 3.73 ± 0.29 | 3.54 ± 0..13 | 168.63 ± 12.53 | 0.53 ± 0.00 |
| N80 | 7.03 ± 0.02 | 5.10 ± 0.02 | 146.54 ± 10.42 | 0.23 ± 0.01 |
| N81 | 11.41 ± 0.18 | 4.83 ± 0.01 | 139.86 ± 3.74 | 0.53 ± 0.02 |
| N82 | 7.39 ± 0.20 | 7.73 ± 0.03 | 201.36 ± 21.73 | 2.28 ± 0.01 |
| N83 | 6.99 ± 0.16 | 7.00 ± 0.02 | 181.82 ± 21.17 | 1.37 ± 0.04 |
| N84 | 9.21 ± 0.06 | 5.27 ± 0.04 | 142.30 ± 12.05 | 0.43 ± 0.00 |
| N85 | 9.56 ± 0.09 | 5.89 ± 0.04 | 158.94 ± 19.48 | 0.23 ± 0.01 |
| N86 | 9.40 ± 0.24 | 4.91 ± 0.20 | 123.22 ± 4.23 | 0.56 ± 0.02 |
| N87 | 6.47 ± 0.22 | 4.94 ± 0.13 | 141.96 ± 19.84 | 0.57 ± 0.01 |
| N88 | 5.35 ± 0.02 | 4.26 ± 0.04 | 161.65 ± 11.03 | 0.35 ± 0.00 |
| N89 | 3.89 ± 0.23 | 5.98 ± 0.06 | 171.62 ± 8.22 | 0.60 ± 0.01 |
| N90 | 7.34 ± 0.36 | 6.51 ± 0.01 | 164.00 ± 11.25 | 0.91 ± 0.03 |
| N91 | 7.31 ± 0.19 | 4.85 ± 0.03 | 147.21 ± 2.73 | 0.41 ± 0.00 |
| N92 | 4.25 ± 0.01 | 4.84 ± 0.07 | 141.92 ± 0.93 | 1.06 ± 0.02 |
| N93 | 6.15 ± 0.11 | 4.75 ± 0.14 | 119.21 ± 3.11 | 1.11 ± 0.05 |
| N94 | 7.10 ± 0.07 | 4.50 ± 0.04 | 115.16 ± 4.81 | 0.98 ± 0.02 |
| N95 | 3.20 ± 0.21 | 4.70 ± 0.01 | 123.63 ± 3.06 | 0.35 ± 0.02 |
| N96 | 5.28 ± 0.19 | 3.49 ± 0.06 | 156.99 ± 17.10 | 0.33 ± 0.02 |
| N97 | 8.97 ± 0.20 | 6.02 ± 0.09 | 139.10 ± 5.54 | 0.37 ± 0.00 |
| N98 | 3.52 ± 0.01 | 3.82 ± 0.10 | 170.91 ± 5.59 | 0.38 ± 0.00 |
| N99 | 6.02 ± 0.29 | 3.94 ± 0.13 | 149.76 ± 7.64 | 0.78 ± 0.01 |
| C1 | 20.74 ± 0.04 | 4.11 ± 0.01 | 156.69 ± 17.60 | 1.31 ± 0.01 |
| C2 | 13.71 ± 0.07 | 5.95 ± 0.05 | 131.63 ± 7.44 | 1.96 ± 0.03 |
| C3 | 3.49 ± 0.12 | 4.61 ± 0.13 | 117.45 ± 11.92 | 0.91 ± 0.04 |
| C4 | 9.26 ± 0.06 | 5.55 ± 0.11 | 155.42 ± 8.83 | 1.45 ± 0.02 |
| C5 | 8.83 ± 0.15 | 6.18 ± 0.22 | 144.90 ± 7.09 | 1.74 ± 0.04 |
| C6 | 4.70 ± 0.05 | 4.34 ± 0.02 | 177.30 ± 1.07 | 0.76 ± 0.05 |
| C7 | 4.15 ± 0.14 | 4.72 ± 0.08 | 168.49 ± 2.04 | 1.46 ± 0.03 |
| C8 | 10.49 ± 0.08 | 5.05 ± 0.08 | 123.10 ± 8.01 | 0.78 ± 0.01 |
| C9 | 5.97 ± 0.11 | 8.34 ± 0.02 | 183.17 ± 15.35 | 1.46 ± 0.00 |
| C10 | 6.74 ± 0.03 | 4.39 ± 0.18 | 157.19 ± 6.58 | 0.95 ± 0.03 |
| C11 | 4.71 ± 0.03 | 8.40 ± 0.28 | 203.34 ± 5.07 | 1.45 ± 0.03 |
| C12 | 11.70 ± 0.10 | 3.69 ± 0.03 | 137.68 ± 0.60 | 0.17 ± 0.00 |
| C13 | 4.46 ± 0.11 | 8.55 ± 0.09 | 209.35 ± 12.01 | 2.56 ± 0.06 |
| C14 | 6.02 ± 0.13 | 5.90 ± 0.07 | 141.96 ± 2.42 | 1.07 ± 0.01 |
| C15 | 9.58 ± 0.42 | 7.57 ± 0.05 | 182.10 ± 5.24 | 1.57 ± 0.03 |
| C16 | 3.68 ± 0.07 | 9.24 ± 0.21 | 201.59 ± 10.27 | 1.33 ± 0.05 |
| C17 | 3.70 ± 0.07 | 5.63 ± 0.08 | 149.99 ± 6.46 | 1.04 ± 0.00 |
| C18 | 5.41 ± 0.09 | 6.15 ± 0.05 | 192.54 ± 6.02 | 2.04 ± 0.04 |
| C19 | 15.81 ± 0.08 | 2.64 ± 0.03 | 143.01 ± 5.62 | 0.73 ± 0.01 |
| C20 | 2.70 ± 0.02 | 8.35 ± 0.17 | 188.14 ± 4.52 | 1.93 ± 0.07 |
| C21 | 4.33 ± 0.04 | 5.75 ± 0.13 | 173.08 ± 21.17 | 0.89 ± 0.04 |
| C22 | 3.79 ± 0.08 | 4.30 ± 0.00 | 184.18 ± 4.30 | 0.88 ± 0.03 |
| C23 | 3.97 ± 0.09 | 6.36 ± 0.15 | 137.31 ± 3.15 | 0.85 ± 0.06 |
| C24 | 7.27 ± 0.04 | 4.31 ± 0.01 | 165.85 ± 1.53 | 0.37 ± 0.00 |
| C25 | 2.59 ± 0.01 | 3.29 ± 0.01 | 170.77 ± 4.93 | 1.09 ± 0.02 |
| C26 | 7.03 ± 0.03 | 3.46 ± 0.01 | 183.42 ± 1.33 | 0.40 ± 0.01 |
| C27 | 2.94 ± 0.03 | 5.89 ± 0.01 | 133.59 ± 4.96 | 1.62 ± 0.05 |
| C28 | 2.41 ± 0.00 | 4.51 ± 0.05 | 193.24 ± 25.27 | 2.25 ± 0.05 |
| C29 | 4.11 ± 0.13 | 4.61 ± 0.08 | 151.12 ± 3.02 | 1.10 ± 0.06 |
| C30 | 4.50 ± 0.19 | 4.16 ± 0.04 | 143.64 ± 5.26 | 0.40 ± 0.01 |
| C31 | 2.49 ± 0.14 | 2.92 ± 0.04 | 138.56 ± 6.59 | 1.21 ± 0.02 |
| C32 | 4.73 ± 0.22 | 7.50 ± 0.12 | 182.00 ± 2.20 | 0.58 ± 0.08 |
| C33 | 27.94 ± 1.20 | 8.66 ± 0.13 | 215.77 ± 2.01 | 0.64 ± 0.03 |
| C34 | 14.54 ± 0.10 | 6.70 ± 0.07 | 148.68 ± 3.03 | 0.53 ± 0.01 |
| C35 | 6.52 ± 0.03 | 4.40 ± 0.10 | 187.96 ± 12.84 | 1.95 ± 0.02 |
| C36 | 22.91 ± 0.29 | 3.68 ± 0.05 | 152.85 ± 4.10 | 1.07 ± 0.04 |
| C37 | 6.49 ± 0.09 | 4.61 ± 0.03 | 163.36 ± 11.43 | 0.64 ± 0.01 |
| C38 | 3.89 ± 0.15 | 3.89 ± 0.10 | 158.04 ± 0.29 | 0.91 ± 0.07 |
| C39 | 16.07 ± 0.01 | 6.79 ± 0.02 | 169.65 ± 4.28 | 0.21 ± 0.00 |
| C40 | 12.33 ± 0.10 | 7.01 ± 0.26 | 166.04 ± 2.65 | 1.27 ± 0.05 |
| C41 | 21.56 ± 0.20 | 6.31 ± 0.08 | 141.41 ± 4.72 | 1.37 ± 0.01 |
| C42 | 4.39 ± 0.21 | 3.49 ± 0.03 | 142.90 ± 1.61 | 1.15 ± 0.01 |
| C43 | 4.75 ± 0.03 | 3.63 ± 0.06 | 154.28 ± 7.46 | 0.76 ± 0.01 |
| C44 | 8.11 ± 0.15 | 4.33 ± 0.03 | 134.57 ± 3.53 | 0.91 ± 0.01 |
| C45 | 5.36 ± 0.03 | 6.08 ± 0.03 | 129.08 ± 12.61 | 1.62 ± 0.13 |
| C46 | 5.65 ± 0.03 | 5.82 ± 0.00 | 127.63 ± 6.26 | 0.60 ± 0.02 |
| C47 | 4.34 ± 0.00 | 5.77 ± 0.09 | 129.23 ± 3.42 | 1.14 ± 0.00 |
| C48 | 11.83 ± 0.14 | 6.90 ± 0.12 | 148.03 ± 2.73 | 1.64 ± 0.00 |
| C49 | 17.70 ± 0.44 | 7.94 ± 4.68 | 143.44 ± 10.74 | 1.13 ± 0.04 |
| C50 | 7.50 ± 0.10 | 5.87 ± 0.13 | 125.13 ± 14.17 | 0.57 ± 0.04 |
| C51 | 23.85 ± 0.39 | 5.74 ± 0.13 | 129.97 ± 3.24 | 1.48 ± 0.07 |
| G1 | 14.69 ± 0.12 | 8.19 ± 0.06 | 177.69 ± 2.52 | 0.63 ± 0.02 |
| G2 | 12.77 ± 0.74 | 5.24 ± 0.25 | 127.30 ± 1.64 | 1.57 ± 0.00 |
| G3 | 25.36 ± 1.92 | 9.74 ± 0.84 | 209.92 ± 3.45 | 0.27 ± 0.01 |
| G4 | 18.17 ± 0.01 | 6.29 ± 0.02 | 128.24 ± 15.58 | 0.24 ± 0.00 |
| G5 | 5.71 ± 0.01 | 7.94 ± 0.19 | 183.59 ± 10.54 | 2.15 ± 0.02 |
| G6 | 2.91 ± 0.13 | 5.53 ± 0.00 | 127.38 ± 6.19 | 0.62 ± 0.01 |
| G7 | 5.39 ± 0.03 | 8.42 ± 0.04 | 182.17 ± 22.12 | 0.58 ± 0.00 |
| G8 | 13.06 ± 0.34 | 6.87 ± 0.05 | 149.39 ± 18.42 | 0.96 ± 0.01 |
| G9 | 24.38 ± 0.48 | 8.30 ± 0.15 | 177.31 ± 0.18 | 1.24 ± 0.03 |
| G10 | 7.14 ± 0.03 | 6.96 ± 0.27 | 156.55 ± 0.35 | 1.67 ± 0.01 |
| G11 | 10.89 ± 0.08 | 5.24 ± 0.08 | 140.74 ± 9.65 | 0.27 ± 0.02 |
| G12 | 10.29 ± 0.10 | 6.47 ± 0.12 | 130.01 ± 4.65 | 1.91 ± 0.05 |
| G13 | 4.99 ± 0.05 | 4.94 ± 0.04 | 116.84 ± 0.98 | 0.67 ± 0.02 |
| G14 | 1.95 ± 0.09 | 6.44 ± 0.01 | 154.60 ± 15.51 | 1.24 ± 0.01 |
| G15 | 4.64 ± 0.00 | 6.89 ± 0.10 | 142.51 ± 18.84 | 0.45 ± 0.01 |
| G16 | 16.94 ± 0.17 | 6.79 ± 0.11 | 168.80 ± 6.98 | 0.33 ± 0.01 |
| G17 | 6.46 ± 0.01 | 6.57 ± 0.12 | 149.58 ± 16.12 | 1.12 ± 0.03 |
| G18 | 6.22 ± 0.13 | 9.32 ± 0.04 | 207.61 ± 11.43 | 1.59 ± 0.03 |
| G19 | 7.73 ± 0.29 | 6.12 ± 0.09 | 135.43 ± 1.13 | 0.59 ± 0.01 |
| G20 | 7.21 ± 0.04 | 7.93 ± 0.11 | 182.33 ± 20.04 | 1.83 ± 0.02 |
| G21 | 14.55 ± 0.22 | 5.94 ± 0.12 | 140.05 ± 0.74 | 0.49 ± 0.03 |
| G22 | 6.46 ± 0.23 | 5.86 ± 0.00 | 157.18 ± 7.40 | 1.10 ± 0.03 |
| G23 | 4.35 ± 0.14 | 7.57 ± 0.02 | 150.22 ± 18.04 | 0.88 ± 0.03 |
| G24 | 8.51 ± 0.26 | 7.02 ± 0.04 | 140.73 ± 14.22 | 0.84 ± 0.05 |
| G25 | 34.19 ± 0.61 | 9.68 ± 0.05 | 206.59 ± 2.89 | 0.71 ± 0.00 |
| G26 | 5.62 ± 0.06 | 5.04 ± 0.05 | 119.07 ± 0.87 | 0.27 ± 0.01 |
| G27 | 30.93 ± 0.08 | 5.92 ± 0.04 | 172.79 ± 15.78 | 0.37 ± 0.01 |

**Table S3.** Recovery of the HILIC-MS/MS method obtained at three different spiking levels.

|  | **Spiked amount (nM)** | **Mean ± SD**  **(nM)** | **Average recovery (%)** | **RSD**  **(%)** |
| --- | --- | --- | --- | --- |
| A | 0 | 2.02 ± 0.01 | - | 0.35 |
| 1 (Low) | 3.02 ± 0.02 | 100.87 | 0.82 |
| 5 (Medium) | 7.04 ± 0.16 | 100.57 | 2.21 |
| 50 (High) | 52.80 ± 0.44 | 101.56 | 0.83 |
|  |  |  |  |  |
| m6A | 0 | 12.07 ± 0.16 | - | 1.35 |
| 1 (Low) | 13.06 ± 0.06 | 98.86 | 0.49 |
| 5 (Medium) | 17.29 ± 0.19 | 103.84 | 1.10 |
| 50 (High) | 66.75 ± 0.11 | 109.35 | 0.17 |
|  |  |  |  |  |
| m1A | 0 | 50.94 ± 2.90 | - | 5.70 |
| 10 (Low) | 61.18 ± 3.18 | 102.48 | 5.20 |
| 100 (Medium) | 157.89 ± 7.63 | 106.95 | 4.83 |
| 500 (High) | 563.25 ± 3.83 | 102.46 | 0.68 |
|  |  |  |  |  |
| m6Am | 0 | 0.35 ± 0.00 | - | 0.24 |
| 0.1 (Low) | 0.45 ± 0.02 | 101.12 | 3.57 |
| 1 (Medium) | 1.34 ± 0.00 | 99.49 | 0.10 |
| 5 (High) | 5.36 ± 0.06 | 100.34 | 1.09 |

**Table S4.** Precision (intra- and interday) and accuracy of the developed HILIC-MS/MS method for the analysis of A, m6A, m1A and m6Am.

| **QC** | **Theoretical values (nM)** | **Intra-day (n = 9)** | | | | **Inter-day (n = 3)** | | |
| --- | --- | --- | --- | --- | --- | --- | --- | --- |
| Mean ± SD (nM) | | RSD (%) | Accuracy (%) | Mean ± SD (nM) | RSD (%) | Accuracy  (%) |
| A | 1 (Low) | 1.01 ± 0.07 | | 6.70 | 100.53 | 0.98 ± 0.06 | 6.06 | 97.74 |
| 10 (Medium) | 9.75 ± 0.13 | | 1.33 | 97.50 | 9.76 ± 0.18 | 1.82 | 97.60 |
| 75 (High) | 74.95 ± 1.31 | | 1.75 | 99.93 | 74.83 ± 1.31 | 1.75 | 99.80 |
|  |  |  |  | |  |  |  |  |
| m6A | 1 (Low) | 0.90 ± 0.03 | | 2.86 | 90.37 | 0.90 ± 0.03 | 3.77 | 88.95 |
| 10 (Medium) | 10.38 ± 0.13 | | 1.30 | 103.77 | 10.38 ± 0.15 | 1.46 | 103.79 |
| 75 (High) | 76.27 ± 2.04 | | 2.68 | 101.70 | 76.54 ± 2.07 | 2.71 | 102.05 |
|  |  |  | |  |  |  |  |  |
| m1A | 10 (Low) | 9.87 ± 0.99 | | 6.18 | 95.36 | 9.47 ± 0.81 | 8.56 | 94.73 |
| 250 (Medium) | 246.52 ± 11.87 | | 2.83 | 98.61 | 246.06 ± 10.30 | 4.23 | 98.41 |
| 750 (High) | 775.96 ± 32.12 | | 4.14 | 103.46 | 775.68 ± 34.03 | 4.39 | 103.42 |
|  |  |  | |  |  |  |  |  |
| m6Am | 0.1 (Low) | 0.10 ± 0.01 | | 6.05 | 103.15 | 0.10 ± 0.01 | 8.82 | 102.37 |
| 2.5 (Medium) | 2.63 ± 0.05 | | 1.74 | 105.36 | 2.64 ± 0.06 | 2.17 | 105.48 |
| 25 (High) | 24.10 ± 0.48 | | 2.01 | 96.39 | 24.12 ± 0.53 | 2.18 | 96.49 |
